# Supplementary material
Source: PubMed Central journal article supplement (PMC4237716)

## Supplemental Figure 1A

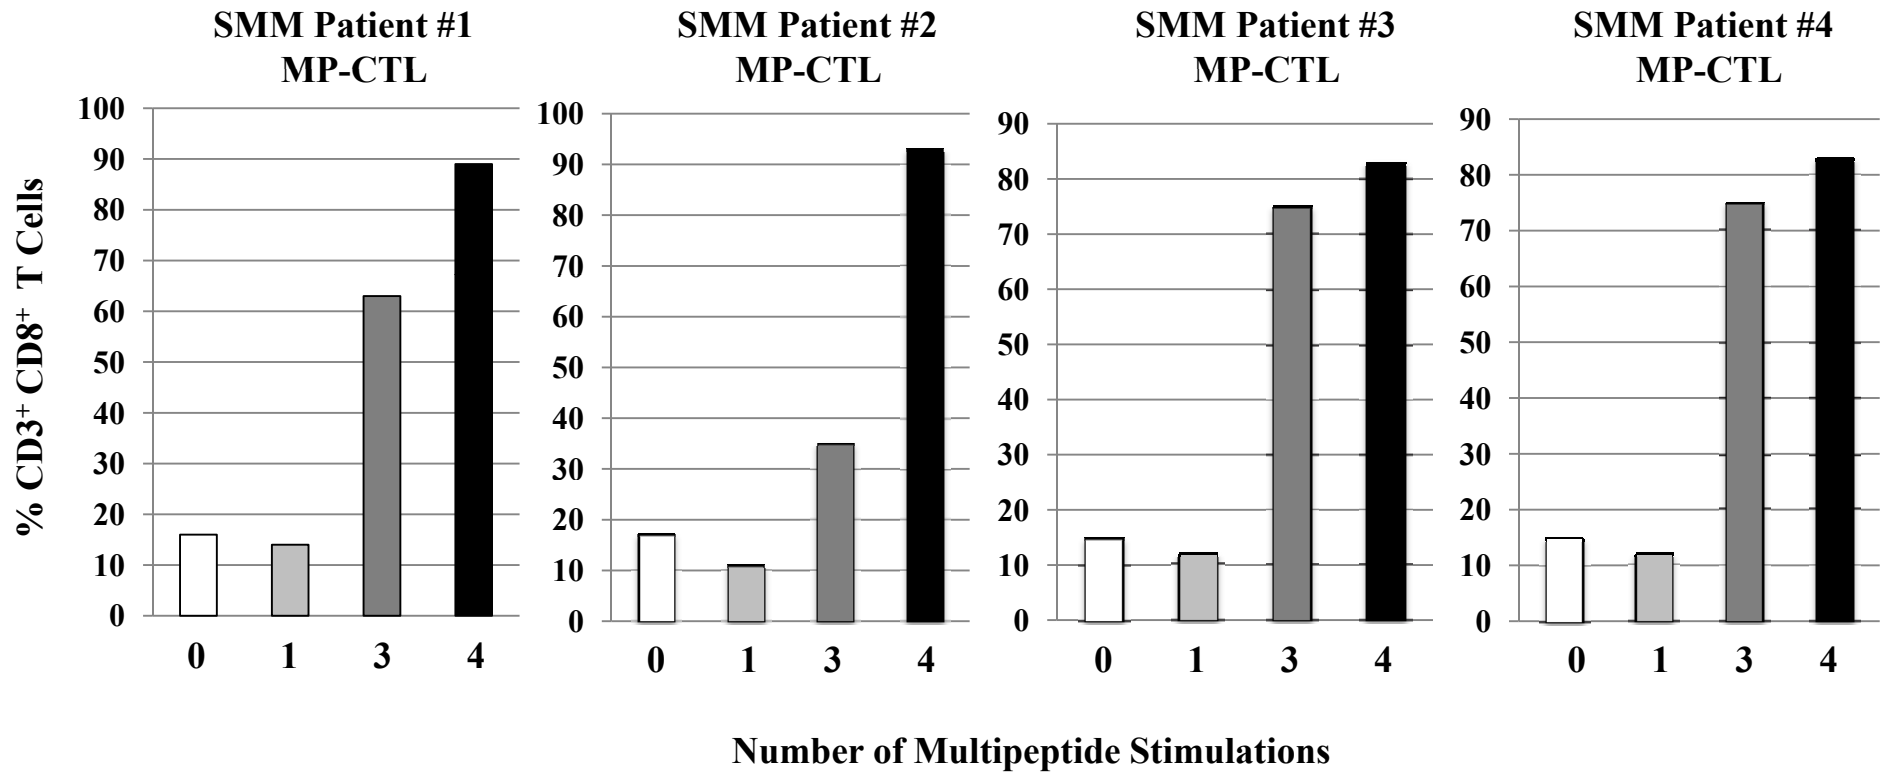

## Supplemental Figure 1B

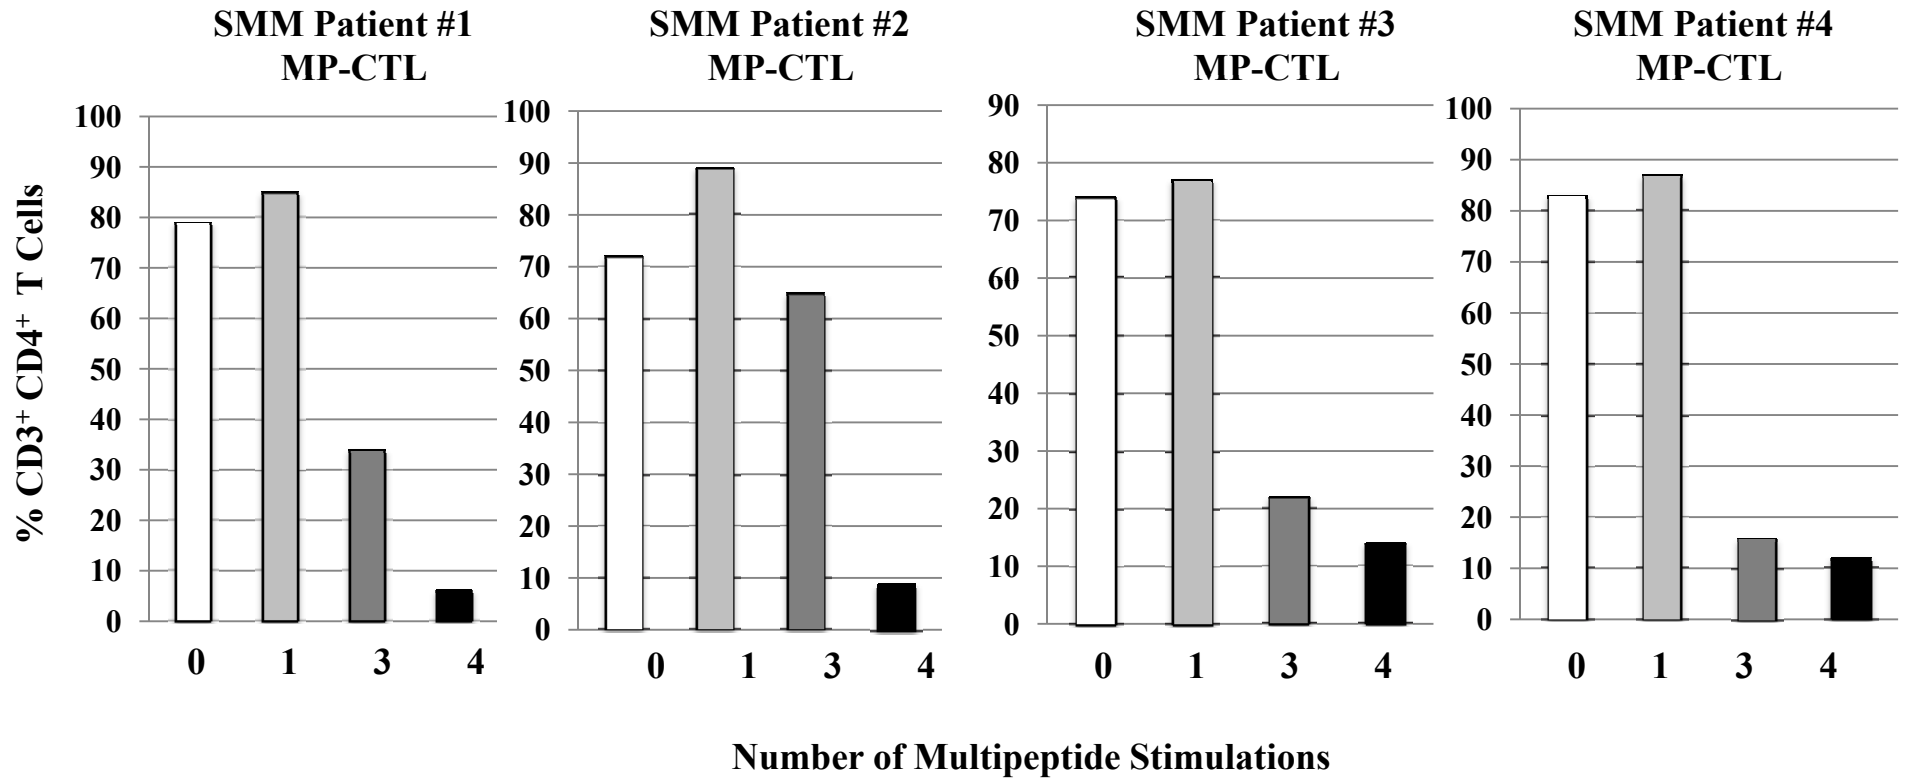

Supplement: NIHMS609005-supplement-Supp_fig1.pdf [file NIHMS609005-supplement-Supp_fig1.pdf]

## Supplemental Figure 2

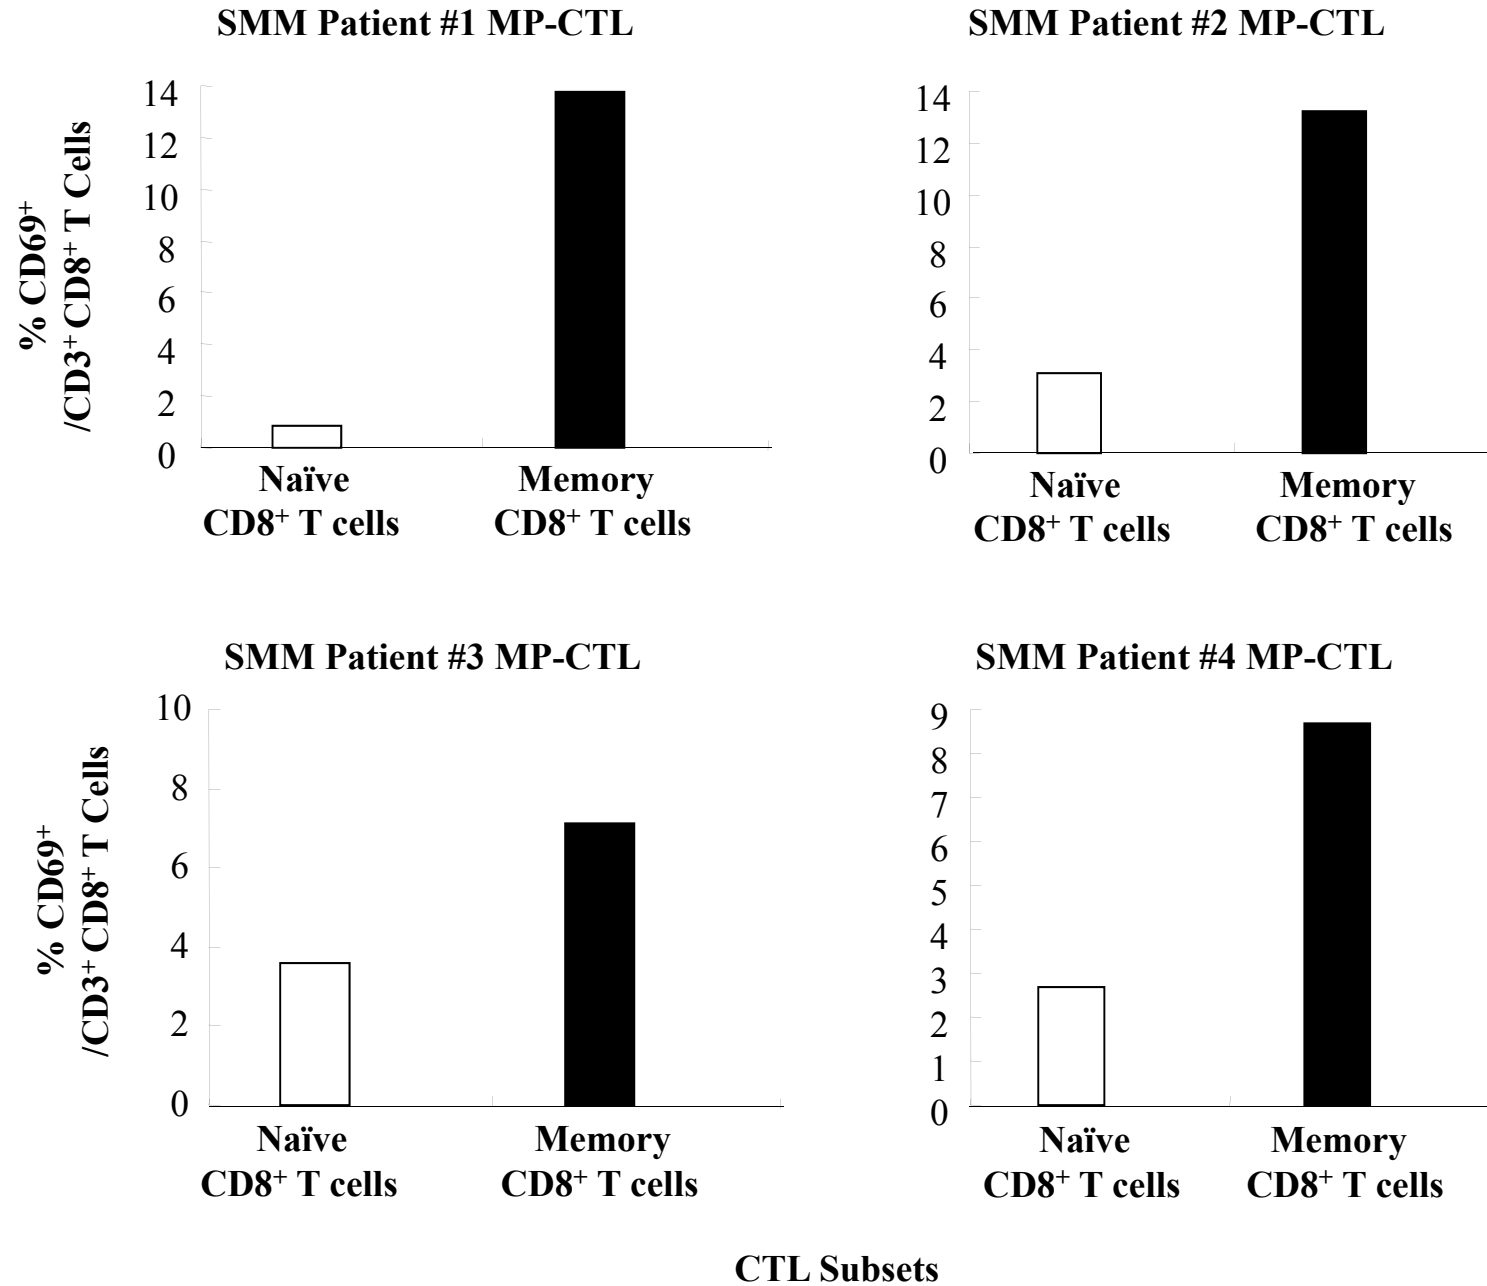

Supplement: NIHMS609005-supplement-Supp_fig2.pdf [file NIHMS609005-supplement-Supp_fig2.pdf]

### Supplemental Figure 3

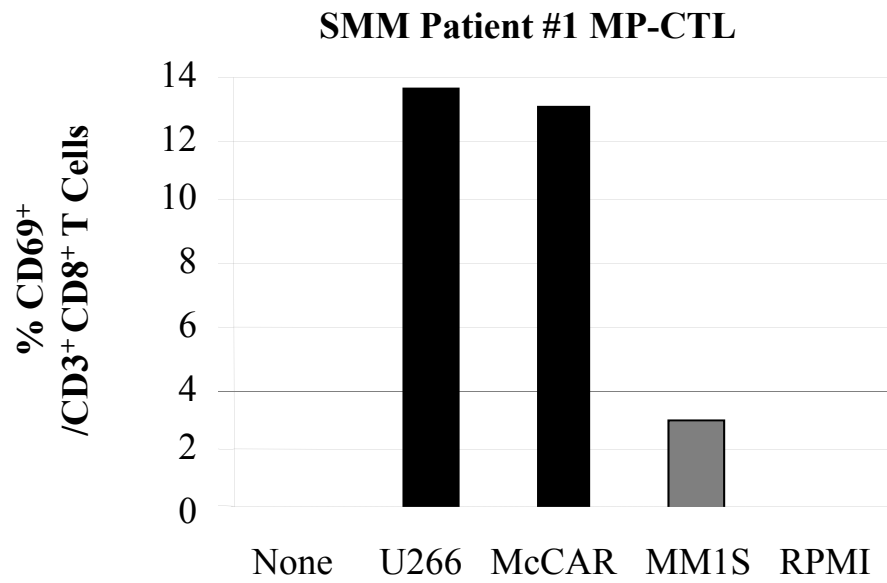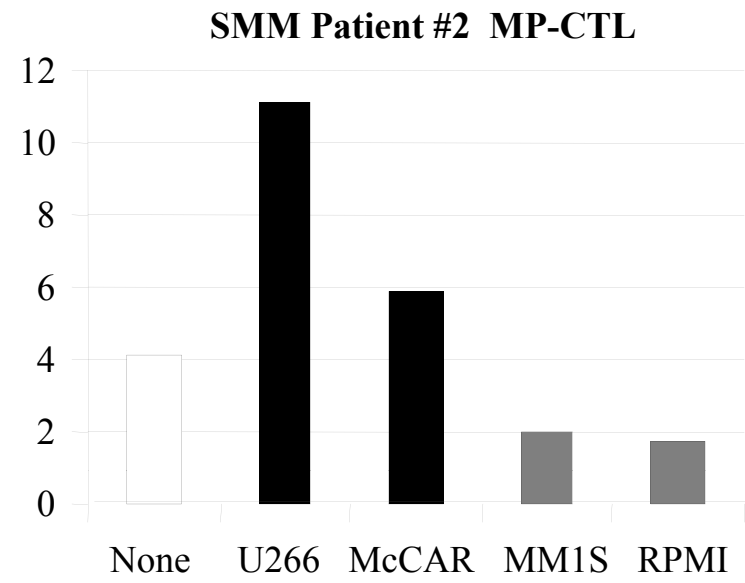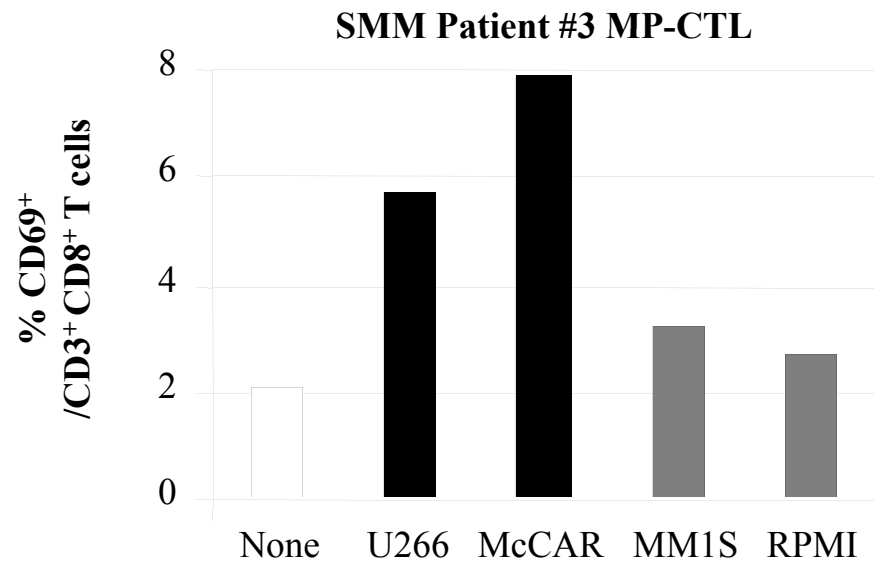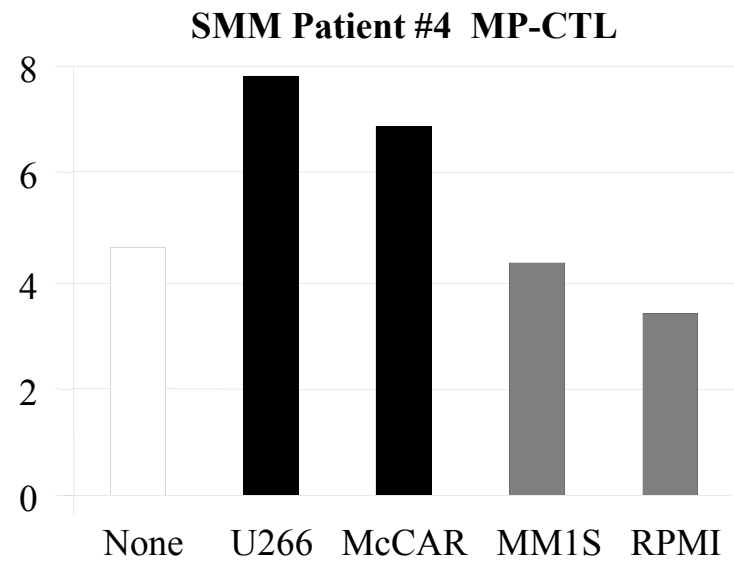

**Stimulator Cells**

Supplement: NIHMS609005-supplement-Supp_fig3.pdf [file NIHMS609005-supplement-Supp_fig3.pdf]
